# Supplementary material for: Acetato-bridged dinuclear lanthanide complexes with single molecule magnet behaviour for the Dy2 species
Source: Royal Society of Chemistry journal article supplement (doi:10.1039/c3dt53366b), 2014-01-01
Supplement: c3dt53366b1.pdf [file c3dt53366b1.pdf]

Supporting Information

## Acetato-bridged dinuclear lanthanide complexes with single molecule magnet behaviour for the Dy<sub>2</sub> species

Haixia Zhang,<sup>a,b</sup> Shuang-Yan Lin,<sup>a,b</sup> Shufang Xue,<sup>a,b</sup> Chao Wang<sup>a</sup> and Jinkui Tang<sup>\*a</sup>

<sup>a</sup> State Key Laboratory of Rare Earth Resource Utilization, Changchun Institute of Applied Chemistry, Chinese Academy of Sciences, Changchun, 130022, China. E-mail: tang@ciac.ac.cn; Fax: +86 431 85262878; Tel: +86 431 85262878

<sup>b</sup> University of Chinese Academy of Sciences, Beijing 100049, China

**Table S1.** Lanthanide geometry analysis by SHAPE 2.1 software.

| Ln     | Capped square antiprism ( $C_{4v}$ ) | Tricapped trigonal prism ( $D_{3h}$ ) | Square antiprism ( $D_{4d}$ ) | Triangular dodecahedron ( $D_{2d}$ ) |
|--------|--------------------------------------|---------------------------------------|-------------------------------|--------------------------------------|
| Sm(1)  | 2.092                                | 2.792                                 | #                             | #                                    |
| Gd(2)  | 1.970                                | 2.666                                 | #                             | #                                    |
| Dy(3)  | 1.917                                | 2.645                                 | #                             | #                                    |
| Tm(4)  | 2.095                                | 3.329                                 | #                             | #                                    |
| Yb1(5) | #                                    | #                                     | 3.969                         | 1.690                                |
| Yb2(5) | 2.033                                | 2.707                                 | #                             | #                                    |
| Dy(6)  | 2.097                                | 2.824                                 | #                             | #                                    |

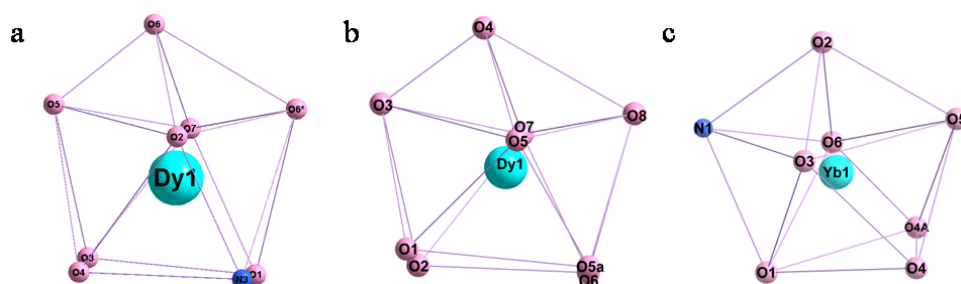

**Fig. S1** Coordination polyhedra observed of (a) Dy1, (b) Dy1, (c) Yb1 in complexes **3**, **6** and **5** respectively.

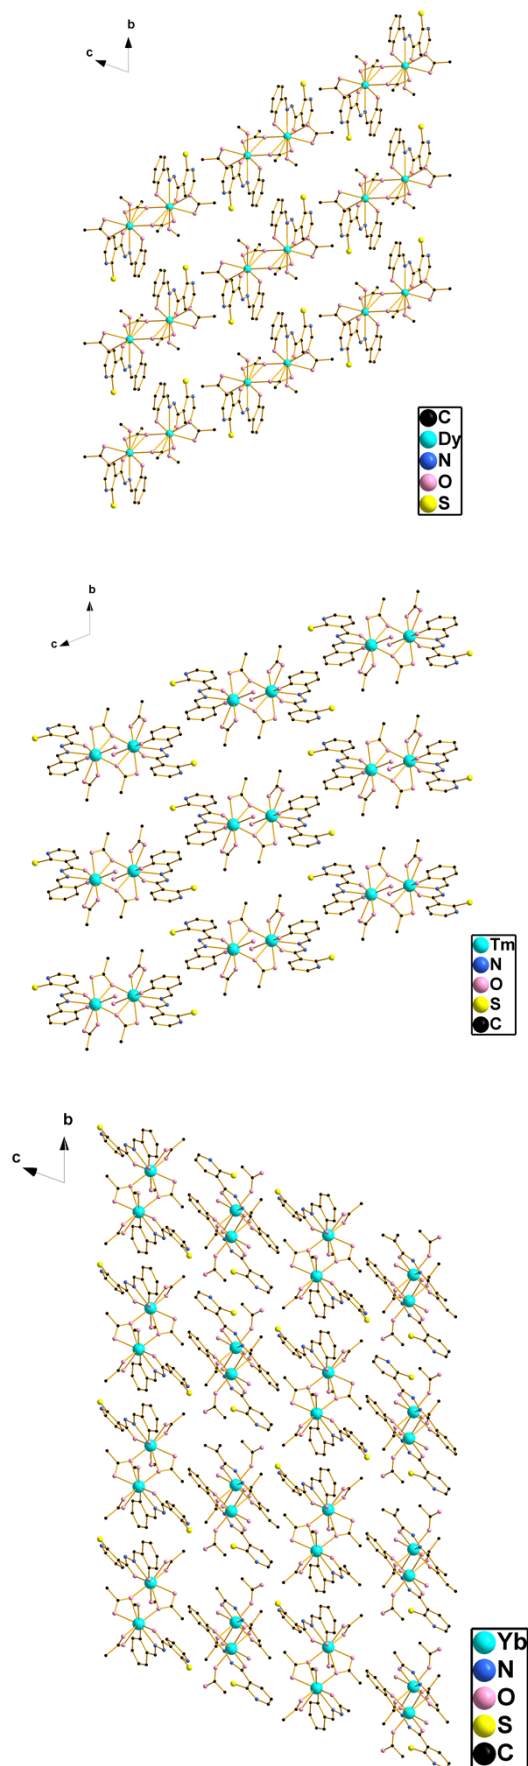

**Fig. S2** Molecular packing diagram of complexes **3**, **4**, **5** along *a* axis.

**Table S2.** Ln–Ln distances in molecular packing diagram of complexes **3**, **4**, **5** along *a* axis.

| Complex                                                                | <b>3</b> | <b>4</b> | <b>5</b> |
|------------------------------------------------------------------------|----------|----------|----------|
| shortest intermolecular Ln–Ln distances for in parallel lines (Å)      | 12.6992  | 10.1025  | 8.4974   |
| shortest intermolecular Ln–Ln distances for between parallel lines (Å) | 10.6225  | 10.9065  | 10.5314  |

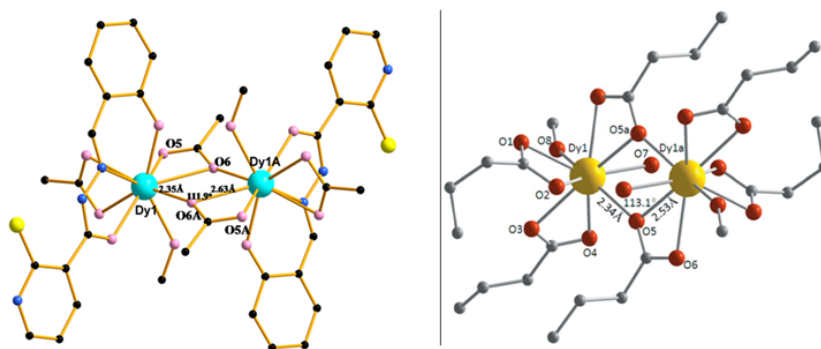

**Fig. S3** The molecular structure of complexes **3** (left) and **6** (right, refs 14a). Hydrogen atoms are omitted for clarity.

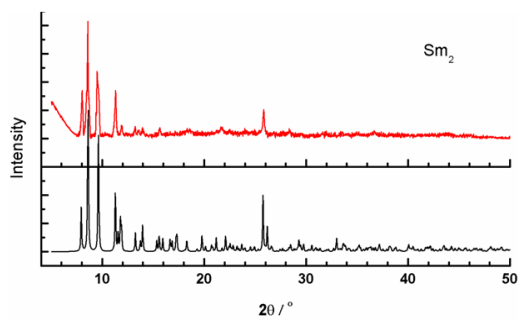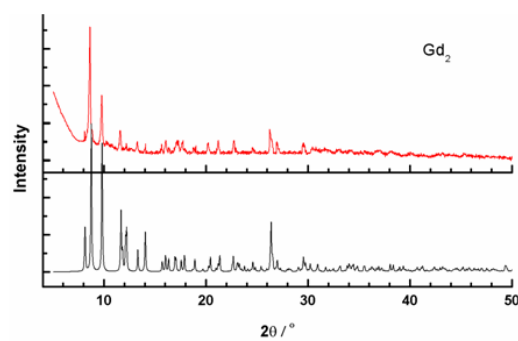

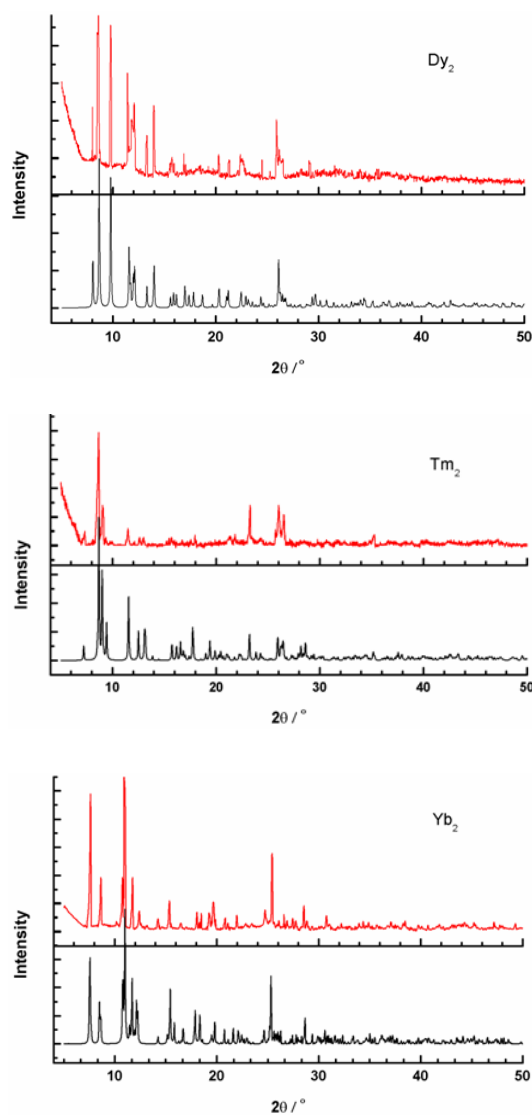

**Fig. 4** The experimental XRD patterns (red) and the calculated XRD patterns of single crystal X-ray diffraction data (black) for complexes **1-5**.

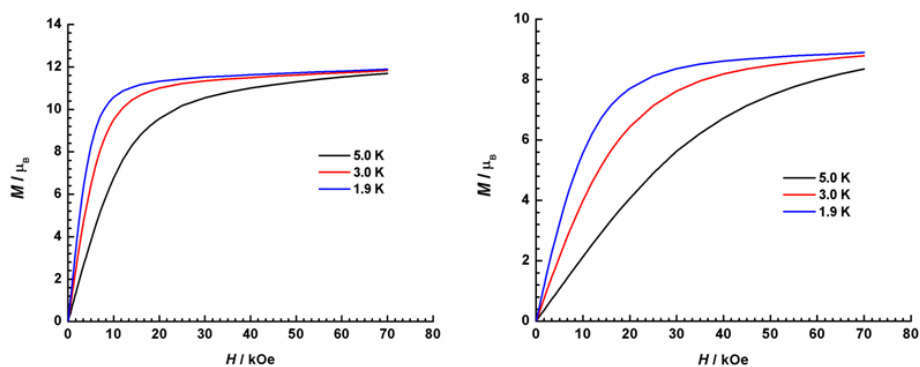

**Fig. S5** Field dependence of magnetizations of **3** (left) and **5** (right) at different temperatures below 5 K.

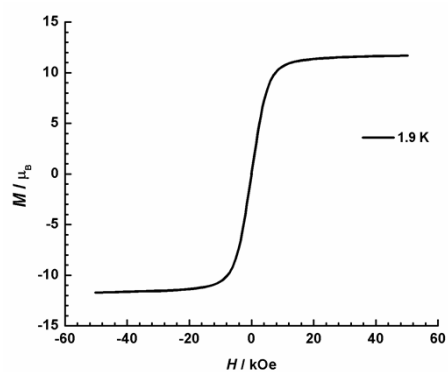

**Fig. S6** Hysteresis loops for **3** at 1.9 K.

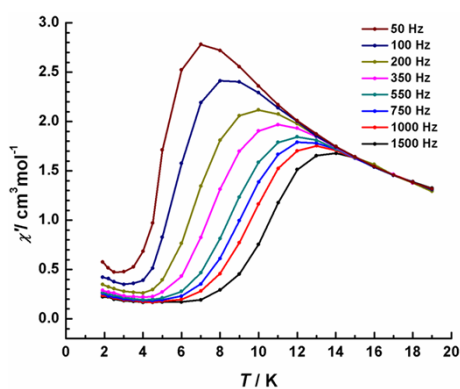

**Fig. S7** Temperature dependence of the in-phase ( $\chi'$ ) of the ac susceptibility for **3** under zero-dc field. The solid lines are guides for the eyes.

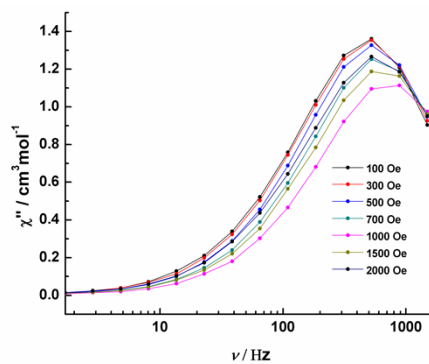

**Fig. S8** Frequency dependence of the out-of-phase ( $\chi''$ ) parts of the ac susceptibility for **3** under various magnetic field at 9 K. The solid lines are guides for the eye.

**Table S4** Relaxation fitting parameters from the least-square fitting of the Cole-Cole plots according to the generalized Debye model for **3**.

| Temperature / K | $\chi_S / \text{cm}^3\text{mol}^{-1}\text{K}$ | $\chi_T / \text{cm}^3\text{mol}^{-1}\text{K}$ | $\tau / \text{s}$ | $\alpha$ |
|-----------------|-----------------------------------------------|-----------------------------------------------|-------------------|----------|
| 1.9             | 0.23697                                       | 9.56297                                       | 1.13E-01          | 0.24943  |
| 2.2             | 0.22369                                       | 8.71436                                       | 9.66E-02          | 0.23217  |
| 2.5             | 0.21126                                       | 7.87979                                       | 7.46E-02          | 0.20992  |
| 3.0             | 0.18547                                       | 6.82012                                       | 4.48E-02          | 0.18191  |
| 3.5             | 0.16649                                       | 6.01678                                       | 2.56E-02          | 0.16465  |
| 4.0             | 0.14639                                       | 5.38099                                       | 2.56E-02          | 0.15326  |
| 4.5             | 0.13844                                       | 4.79735                                       | 8.48E-03          | 0.11009  |
| 5.0             | 0.11335                                       | 4.47684                                       | 5.15E-03          | 0.14714  |
| 6.0             | 0.08540                                       | 3.80817                                       | 2.18E-03          | 0.13750  |
| 7.0             | 0.05798                                       | 3.31482                                       | 1.03E-03          | 0.12850  |
| 8.0             | 0.04878                                       | 2.93787                                       | 5.59E-04          | 0.12114  |
| 9.0             | 0.07068                                       | 2.63777                                       | 3.27E-04          | 0.11032  |
| 10.0            | 0.07707                                       | 2.39497                                       | 1.85E-04          | 0.11620  |
| 11.0            | 0.22482                                       | 2.18837                                       | 1.06E-04          | 0.09961  |
| 12.0            | 0.34635                                       | 2.02223                                       | 1.02E-04          | 0.10292  |
| 13.0            | 0.85480                                       | 1.87351                                       | 7.39E-05          | 0.04674  |
